# Supplementary material for: Reconstructing the maize leaf regulatory network using ChIP-seq data of 104 transcription factors
Source: PubMed Central journal article supplement (PMC7547689; doi:10.1038/s41467-020-18832-8), 2020-10-09
Supplement: 41467_2020_18832_MOESM4_ESM.pdf [file 41467_2020_18832_MOESM4_ESM.pdf]

## **Description of Additional Supplementary Files**

File name: Supplementary Data 1:

Description: The 104 maize leaf TFs selected for CHIP-seq

File name: Supplementary Data 2:

Description: Quality control information of the CHIP-seq libraries

File name: Supplementary Data 3:

Description: List of CHIP-seq and ATAC-seq libraries

File name: Supplementary Data 4:

Description: Pearson correlation of CHIP-seq library replicate bam files

File name: Supplementary Data 5:

Description: TF binding loci in the maize leaf

File name: Supplementary Data 6:

Description: TF classification based on their target gene GO-term and MAPMAN functional category enrichment

File name: Supplementary Data 7:

Description: The hub genes and the high TF occupancy regions

File name: Supplementary Data 8:

Description: eQTL enrichment in TF binding sites

File name: Supplementary Data 9:

Description: GWAS hit enrichment in TF binding sites

File name: Supplementary Data 10:

Description: The gene regulatory network

File name: Supplementary Data 11:

Description: Network modules

File name: Supplementary Data 12:

Description: Performance of bag-of-k-mers models

File name: Supplementary Data 13:

Description: Results of bag-of-k-mers models

File name: Supplementary Data 14:

Description: Performance of co-localization models
